# Supplementary material
Source: PubMed Central journal article supplement (PMC3370270)
Supplement: mmc1.pdf [file mmc1.pdf]

## Supplemental Data

### Duplication of *GTF2I* Results in

### Separation Anxiety in Mice and Humans

Carolyn B. Mervis, Joana Dida, Emily Lam, Nicole A. Crawford-Zelli, Edwin J. Young, Danielle R. Henderson, Tuncer Onay, Colleen A. Morris, Janet Woodruff-Borden, John Yeomans, and Lucy R. Osborne

Table S1. Primer Sequences

| Primer Set             | Forward Primer Sequence (5'–3') | Reverse Primer Sequence (5'–3') |
|------------------------|---------------------------------|---------------------------------|
| <i>Gtf2i</i> exon 30   | CAGGAAGATCACCATCAACC            | AGATCCTCCTCATGGAGCTG            |
| <i>Hmbs</i>            | TCCAAGAGGAGCCCAGCTA             | ATTAAGCTGCCGTGCAACA             |
| GtDup                  | CAAGCACTGGCTATGCATGT            | GTTTTCCCAGTCACGACGTT            |
| <i>Gtf2i</i> exon 5    | CGCCGAGATGCATAAGATG             | CAGAAATAGTCCTCCACCGTTT          |
| <i>Gtf2ird1</i> exon 8 | CGAGGCTGTGGAAATTGTG             | TGTGTCGCTCCTCCAGAATC            |
| <i>Clip2</i> exon 3    | GAACCTGTCCCTGCATTCTG            | ACTCATTGCCCGTCTTCACT            |
| <i>Sdha</i>            | TGATCTTCGCTGGTGTGGATGTCA        | CCCACCCATGTTGTAATGCACAGT        |
